# Supplementary material
Source: Springer Nature journal article supplement (https://www.springermedizin.de/resource/supplementary/12885_2013_5201_MOESM4_ESM.pdf/9466174)

**A**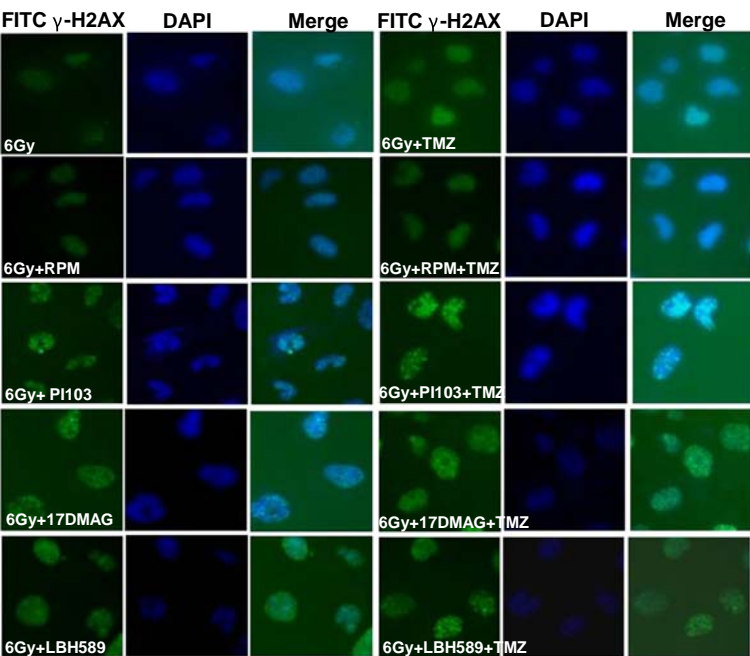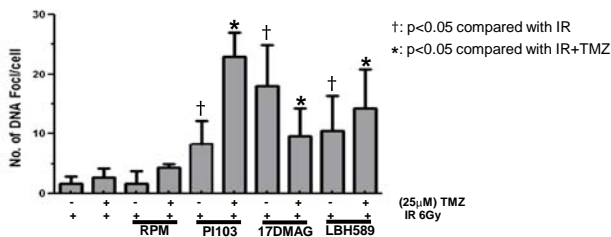**B**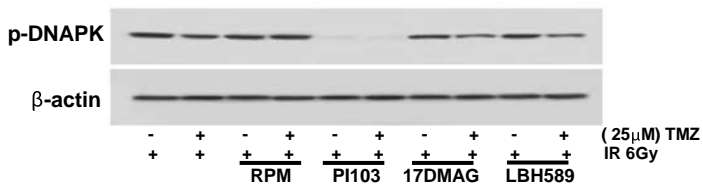

Supplement: MOESM4 [file 9466174]
